# Supplementary material for: Exploring the Molecular Players behind the Potentiation of Chemotherapy Effects by Durvalumab in Lung Adenocarcinoma Cell Lines
Source: Pharmaceutics. 2023 May 12;15(5):1485. doi: 10.3390/pharmaceutics15051485 (PMC10221650; doi:10.3390/pharmaceutics15051485)
Supplement: Supplementary file 1 [file pharmaceutics-15-01485-s001.zip]

Archive with 4 entries (4 files):
- pharmaceutics-2306971_Supplementary Figures and Table legends.pdf
- pharmaceutics-2306971_Supplementary Table S1.xlsx
- pharmaceutics-2306971_Supplementary Table S2.xlsx
- pharmaceutics-2306971_Supplementary Table S3.xlsx
