# Supplementary material for: Exploring the Molecular Players behind the Potentiation of Chemotherapy Effects by Durvalumab in Lung Adenocarcinoma Cell Lines
Source: Pharmaceutics. 2023 May 12;15(5):1485. doi: 10.3390/pharmaceutics15051485 (PMC10221650; doi:10.3390/pharmaceutics15051485)
Supplement: Supplementary file 1 [file pharmaceutics-15-01485-s001.zip › pharmaceutics-2306971_Supplementary Table S1.xlsx]

## Sheet: part_A
name	ID	P_adj (MIX1 vs cisplatin)	log2FC (MIX1 vs cisplatin)
IGKV3D-20	A0A0C4DH25	4.78e-08	3.56
ACTN4.1	K7EJH8	0.0707	1.88
SYNJ2BP-COX16	A0A087WYV9	0.0659	1.32
GSPT2	Q8IYD1	7.89e-05	1.15
RB1	P06400	0.0851	1.14
UVRAG	E9PR71	0.0594	1.05
NO66	Q9H6W3	0.0716	0.928
CCDC134	Q9H6E4	0.0322	0.817
CREM	E9PAR2	0.0125	0.723
WDR92	Q96MX6	0.0717	0.718
CTR9	Q6PD62	0.0902	0.577
44260	Q9NX47	0.0727	0.528
GLE1	Q53GS7	0.0979	0.489
IGHG1	A0A0A0MS08	0.0907	0.444
FAM96B	Q9Y3D0	0.0684	0.402
EPS15L1	Q9UBC2-2	0.0713	-0.405
ATP5J2-PTCD1	G3V325	0.0459	-0.466
RAB5A	P20339-2	0.0701	-0.543
RMND1	A0A087WXU0	9.73e-06	-0.562
CHCHD1	Q96BP2	0.0294	-0.583
DCTN5	Q9BTE1	0.0407	-0.625
FUT8	Q9BYC5	0.0758	-0.671
DCXR	J3KS22	0.0913	-0.688
AKAP1	Q92667	0.0757	-0.693
INTS6	Q9UL03-3	0.0702	-0.716
RBM26	Q5T8P6-2	0.0343	-0.719
HOOK3	Q86VS8	0.0913	-0.74
DAGLB	E7ET49	0.0575	-0.788
ANXA8L2	Q5VT79	0.0668	-0.788
ZCCHC6	Q5VYS8-6	0.0357	-0.838
XPA	F2Z2T2	0.0384	-0.849
KIF3A	J3KPF9	0.0899	-0.879
MED1	Q15648	0.00267	-0.91
GTPBP1	O00178	0.00528	-0.959
MLF2	Q15773	0.097	-1.11
SMCHD1	A6NHR9	0.00119	-1.13
CBX4	O00257	0.0618	-1.18
ANKRD17	H0YM23	0.0446	-1.21
LGALS8	O00214	0.0464	-1.27
DNASE2	O00115	0.0493	-1.32
DPY30	Q9C005	0.0979	-1.32
RIN1	E9PNR2	0.0667	-1.33
CFDP1	Q9UEE9	0.0351	-1.4
MED11	I3L3E8	0.0608	-1.4
IGF2BP2	F8W930	0.0644	-1.47
GATAD2A	Q86YP4-2	6.82e-05	-1.54
MALL	Q13021	0.0873	-1.54
LAMC1	P11047	0.0771	-1.74
PANK4	Q9NVE7	0.000273	-1.99
PRDX2	P32119	0.0017	-2.15
ZNF609	O15014	2.79e-06	-3.93

## Sheet: part_B
name	ID	P_adj (MIX1 vs durvalumab)	log2FC (MIX1 vs durvalumab)
FDXR	P22570	2.93e-06	1.39
RETSAT	Q6NUM9	0.0644	1.08
KRT19	P08727	0.0511	0.754
MCM2	P49736	0.0851	-0.441
HIST2H3A	Q71DI3	0.0487	-0.562
HIST1H1C	P16403	0.0469	-0.728
TFB2M	Q9H5Q4	0.0995	-0.83
KIF4A	O95239	0.0176	-0.908
HIST1H1B	P16401	0.0167	-1.04
UBL7	H3BV23	0.0393	-1.18
SMCHD1	A6NHR9	0.0384	-1.27

## Sheet: part_C
name	ID	P_adj (MIX2 vs pemetrexed)	log2FC (MIX2 vs pemetrexed)
SRP19	A0A087WYR0	0.0991	1.21
NSMCE1	I3L1I3	0.0489	0.797
Q3ZBD7	Q3ZBD7	0.0478	0.736
IFI30	P13284	0.0665	0.669
ABCB7	A0A590UJS8	0.0744	0.667
MAP1LC3B	H3BTL1	0.0575	0.617
MED23	Q5JWT2	0.0668	0.459
MZT2B	H7C173	0.0668	-0.394
ARMC1	Q9NVT9	0.0646	-0.498
EEFSEC	P57772	0.0614	-0.572
TWISTNB	Q3B726	0.0662	-0.607
NENF	Q9UMX5	0.0619	-0.65
LDAH	B5MDU6	0.0551	-0.653
EXOSC8	Q96B26	0.0638	-0.675
UBAP2	Q5T6F2	0.0298	-0.703
ANO6	Q4KMQ2-3	0.0662	-0.731
ATXN2	Q99700	0.00125	-0.804
TMEM109	Q9BVC6	0.0596	-0.822
PPP1R10	Q96QC0	5.6e-06	-0.942
WDR55	Q9H6Y2	0.0554	-0.961
CCDC97	Q96F63	0.0428	-1.09
P15497	P15497	0.0989	-1.14
AKAP8	O43823	0.0372	-1.19
IGF2BP2	F8W930	0.0656	-1.52
STAT5B	P51692	0.07	-1.7
PTMS	P20962	0.0407	-1.72
RBBP6	Q7Z6E9-2	0.00148	-1.94
HIP1R	O75146	0.0115	-2.08

## Sheet: part_D
name	ID	P_adj (MIX2 vs durvalumab)	log2FC (MIX2 vs durvalumab)
TYMS	P04818	0.00149	3.06
CISD3	P0C7P0	0.072	3.01
ANLN	Q9NQW6	1.93e-09	3
CKAP2	Q8WWK9-5	4.51e-12	2.92
NUPR1	O60356	1.62e-07	2.47
TPX2	Q9ULW0	0.014	2.41
KIF11	P52732	0.000581	2.15
RRM2	P31350	0.000117	1.96
PPAT	Q06203	0.00277	1.92
TK1	P04183	0.000872	1.68
FAM83D	A0A087WXK8	0.0428	1.65
CENPF	P49454	9.02e-05	1.57
CCNB1	P14635	0.00605	1.57
FANCI	Q9NVI1	0.07	1.57
KIF2C	Q99661	1.25e-06	1.46
TOP2A	P11388	1.13e-12	1.32
NMES1	Q9C002	0.0968	1.32
PRC1	O43663-4	0.000573	1.29
SHCBP1	Q8NEM2	7.45e-06	1.26
FDXR	P22570	5.56e-05	1.17
NFKB2	Q00653	0.069	1.12
CISD1	Q9NZ45	4.21e-11	1.07
SNAP25	P60880-2	0.0136	1.07
DRAP1	C9JCC6	0.021	1.03
ASMTL	O95671	0.0145	1.01
MKI67	P46013	7.78e-06	0.978
GSTM3	P21266	0.00727	0.967
GMNN	H7C608	0.0707	0.957
PBK	Q96KB5	7.18e-06	0.893
FBXO22	Q8NEZ5	0.00131	0.854
TPM1	P09493-3	0.0135	0.829
HSPA4L	O95757	0.000581	0.781
CMAS	Q8NFW8	0.00113	0.759
COX7A2	P14406	0.00272	0.707
DHFR	P00374	0.0383	0.696
EPHA2	P29317	0.0578	0.69
PDXDC1	Q6P996-4	0.0914	0.673
KIF23	A0A2U3TZL8	0.0647	0.643
CTPS1	A0A3B3IRI2	0.00566	0.611
LSM14A	Q8ND56-3	0.017	0.605
KPNA2	P52292	0.0834	0.601
CKS1B	P61024	0.07	0.55
PDE6D	O43924	0.036	0.539
SDHB	P21912	0.0142	0.538
DBN1	Q16643	0.025	0.478
POLR3A	O14802	0.0513	0.478
SDHA	P31040	0.0126	0.433
SUPT5H	O00267	0.0965	0.421
SHMT2	P34897	0.0792	0.382
HIST1H4A	P62805	0.0317	-0.404
PGK1	P00558	0.0853	-0.415
ATP2B1	P20020-1	0.059	-0.444
NAMPT	P43490	0.000525	-0.518
HIST2H3A	Q71DI3	0.00825	-0.559
GCLC	P48506	0.00684	-0.562
STC2	O76061	0.0705	-0.743
TFB2M	Q9H5Q4	0.0467	-0.765
LAMTOR2	Q9Y2Q5-2	0.0954	-0.77
TBC1D9B	Q66K14-2	0.0534	-0.773
NRP1	Q5JWQ6	0.00955	-0.776
FTL	P02792	0.0133	-0.786
PLSCR1	C9J7K9	0.0431	-0.786
TAX1BP1	B8ZZD4	0.0728	-0.923
UBL7	H3BV23	0.0693	-0.932
S100P	P25815	0.0142	-0.942
HIST1H1C	P16403	1.59e-05	-0.987
H1FX	Q92522	0.00742	-1.04
AKAP13	Q12802-4	0.0398	-1.08
TMEM30A	A0A669KBF5	0.0405	-1.09
SLC7A11	Q9UPY5	0.00601	-1.1
H1F0	P07305	0.0234	-1.13
HIST1H1B	P16401	0.000143	-1.16
ALG13	Q9NP73-2	0.0188	-1.26
PTPN12	Q05209	0.00643	-1.33
PBXIP1	Q96AQ6	0.000677	-1.35
CES1	P23141-3	1.82e-08	-1.5
CEACAM6	P40199	0.00213	-1.55
SCD	O00767	0.0695	-1.59
TGFBR2	P37173	0.0539	-1.6
HPGD	P15428	0.0132	-1.64
IREB2	P48200	1.25e-06	-2.18
SLC12A2	P55011	0.000347	-2.56
