# Supplementary material for: Exploring the Molecular Players behind the Potentiation of Chemotherapy Effects by Durvalumab in Lung Adenocarcinoma Cell Lines
Source: Pharmaceutics. 2023 May 12;15(5):1485. doi: 10.3390/pharmaceutics15051485 (PMC10221650; doi:10.3390/pharmaceutics15051485)
Supplement: Supplementary file 1 [file pharmaceutics-15-01485-s001.zip › pharmaceutics-2306971_Supplementary Table S2.xlsx]

## Sheet: part_A
name	ID	P_adj (MIX1 vs cisplatin)	log2FC (MIX1 vs cisplatin)
IGKV3D-20	A0A0C4DH25	0.0171	2.89
PTGS2	P35354	0.000876	1.72
DDX58	A2A376	0.0541	1.38
EEF1A2	A0A2U3TZH3	0.0213	0.907
MAP1LC3B	H3BTL1	0.0663	0.875
GLIPR1	P48060	0.00592	0.874
FHL2	Q14192	0.0818	0.814
SQRDL	Q9Y6N5	0.00691	0.769
MVP	Q14764	0.000147	0.693
MAP2K3	P46734	0.0155	0.659
KYNU	Q16719	0.0292	0.639
SDCBP	O00560	0.00722	0.573
SERPINB2	P05120	0.0664	0.552
BLVRB	P30043	0.0277	0.522
SQSTM1	Q13501	0.00615	0.518
PLEC	Q15149	0.072	0.376
SET	Q01105	0.0452	-0.488
DUT	P33316-2	0.00284	-0.492
TOP2A	P11388	0.0363	-0.497
PDCD4	Q53EL6	0.0945	-0.656
CUEDC2	Q9H467	0.0116	-0.932
TRIOBP	Q9H2D6-5	0.0533	-1.6

## Sheet: part_B
name	ID	P_adj (MIX1 vs durvalumab)	log2FC (MIX1 vs durvalumab)
CKAP2	Q8WWK9-5	9.2e-14	4.11
KIF11	P52732	9.2e-14	4.11
ANLN	Q9NQW6	9.2e-14	4.11
AURKA	O14965	0.0269	4.07
RRM2	P31350	4.44e-07	3.21
DLGAP5	Q15398-3	3.22e-05	3.02
SHCBP1	Q8NEM2	4.72e-07	2.65
CCNB1	P14635	9.2e-14	2.63
KIF23	A0A2U3TZL8	9.2e-14	2.62
KIAA0101	Q15004	3.11e-10	2.59
KIFC1	Q9BW19	9.2e-14	2.53
AXIN1	O15169-2	0.0168	2.43
TACC3	A0A494BZT8	1.32e-05	2.4
TK1	P04183	6.76e-05	2.37
RACGAP1	Q9H0H5	9.2e-14	2.36
TPX2	Q9ULW0	9.2e-14	2.33
AURKB	Q96GD4	1.85e-08	2.31
KIF2C	Q99661	1.02e-06	2.22
CLIC3	O95833	1.6e-10	2.18
DDX58	A2A376	4.19e-06	2.1
KIF18A	Q8NI77	3.94e-07	2.03
CENPF	P49454	0.000398	2.03
HIGD2A	Q9BW72	0.0914	2.01
PLK1	P53350	0.0741	1.98
PRC1	O43663-4	9.2e-14	1.96
UBE2S	Q16763	2.6e-08	1.95
COL6A1	A0A087X0S5	5.89e-10	1.86
FAM83D	A0A087WXK8	0.0879	1.83
KPNA2	P52292	9.2e-14	1.8
ICAM1	P05362	0.000345	1.8
BUB1B	O60566-3	3.76e-09	1.71
MYO6	Q9UM54-5	0.0991	1.69
TOP2A	P11388	9.2e-14	1.63
TFIP11	Q9UBB9	0.0305	1.6
SERPINB8	P50452	0.0363	1.6
TYMS	P04818	0.0209	1.59
IFIT2	A0A087X279	0.0162	1.56
DIAPH3	Q9NSV4-4	0.013	1.48
NEIL2	Q969S2-4	0.0502	1.47
CRABP2	P29373	0.0565	1.46
PGM2L1	Q6PCE3	0.0288	1.45
MAP1LC3B	H3BTL1	7.94e-07	1.43
NMES1	Q9C002	0.00313	1.39
HMGCS1	Q01581	7.84e-06	1.34
NDC80	O14777	2.79e-05	1.34
TTK	P33981-2	0.0537	1.34
UPP1	Q16831	0.00169	1.33
PTGS2	P35354	0.00933	1.32
MGLL	A0A0C4DFN3	0.017	1.32
SLC12A4	Q9UP95-2	0.0461	1.32
PPP1R18	A0A0G2JHC2	0.0345	1.28
MFGE8	Q08431-4	0.073	1.26
CKS2	P33552	0.0101	1.22
KNSTRN	V9GY01	0.0421	1.22
GBP1	P32455	0.0616	1.22
FHL2	Q14192	2.55e-05	1.21
UBE2C	O00762	0.00287	1.19
SLC30A7	Q8NEW0	0.0207	1.19
SQLE	Q14534	0.0233	1.18
SQSTM1	Q13501	9.2e-14	1.13
MKI67	P46013	1.19e-12	1.12
NUF2	Q9BZD4	0.0105	1.1
EPS8L2	Q9H6S3	0.082	1.1
LIMA1	Q9UHB6	2.5e-11	1.09
KIAA1524	A0A087X211	0.000307	1.08
KIF20B	Q96Q89-3	0.081	1.08
UBAP2	Q5T6F2	0.0943	1.08
RB1	P06400	0.0959	1.04
CDA	P32320	0.0792	1.03
EPHA2	P29317	6.75e-07	1.01
GNE	Q9Y223	0.0878	1.01
PDLIM4	P50479	0.00585	1
CDK1	P06493	5.2e-07	0.98
MAD2L1	Q13257	5.29e-05	0.98
CKS1B	P61024	0.00228	0.979
TUBB3	Q13509	0.0102	0.968
DUSP3	P51452	0.000792	0.959
SERPINB2	P05120	1.15e-07	0.958
PLAU	E7ET40	0.00771	0.955
GLIPR1	P48060	0.000146	0.954
TUBB2A	Q13885	3.55e-05	0.95
ISG15	P05161	0.000796	0.921
SPTAN1.1	Q13813-3	0.0879	0.914
ZNF185	O15231-3	0.0486	0.875
KRT81	A0A087X106	4.14e-08	0.87
NEDD4L	Q96PU5-3	0.046	0.847
APOL2	J3KQL8	0.074	0.812
SQRDL	Q9Y6N5	0.000482	0.808
MAP1B	P46821	6.65e-07	0.789
UAP1	Q16222	0.0169	0.765
TAX1BP3	O14907	0.0704	0.758
MGST2	Q99735-2	0.0628	0.747
NCEH1	Q6PIU2	0.0128	0.686
TMEM214	Q6NUQ4	0.00501	0.681
WASF2	Q9Y6W5	0.0597	0.662
KIAA0100	Q08E86	0.00923	0.66
SUPT4H1	P63272	0.0365	0.622
ACAA1	P09110	0.072	0.614
SDCBP	O00560	0.000581	0.601
TJP2	Q9UDY2	0.0694	0.592
FKBP9	O95302	0.0535	0.585
TLDC1	Q6P9B6	0.00978	0.572
ANXA3	P12429	0.013	0.563
NCAPH	E9PHA2	0.00744	0.556
MAP2K3	P46734	0.027	0.553
NAMPT	P43490	9.39e-05	0.552
C17orf62	J3QRG5	0.0429	0.545
CKAP5	Q14008-2	0.00951	0.53
SYNGR2	O43760	0.0957	0.522
TXNDC9	O14530	0.0882	0.519
MAP4K4	O95819-6	0.0858	0.518
REEP4	E5RGS2	0.0243	0.486
SLK	Q9H2G2-2	0.0087	0.485
TUBA4A	P68366	0.0272	0.477
SUPT5H	O00267	7.67e-05	0.47
NCAPG	Q9BPX3	0.0672	0.467
HSPH1	Q92598-2	0.0227	0.464
GSTM3	P21266	0.00693	0.458
TUBB6	Q9BUF5	0.0194	0.45
OAT	P04181	0.0544	0.449
KRT19	P08727	0.0368	0.445
SLC2A1	P11166	0.0183	0.443
RAB18	Q9NP72	0.0961	0.44
FLNB	O75369-8	0.0102	0.437
CKB	P12277	0.0486	0.425
EHD1	Q9H4M9	0.0176	0.423
AKR1B1	P15121	0.019	0.417
HSPA1B	A0A0G2JIW1	0.064	0.304
SRSF1	J3KTL2	0.068	-0.347
UBTF	E9PKP7	0.0413	-0.377
MCM6	Q14566	0.0885	-0.379
SDF4	A0A5F9UP49	0.0651	-0.383
TRIM28	Q13263	0.0452	-0.409
LMNB1	P20700	0.0416	-0.412
GTF2I	P78347-2	0.0456	-0.436
TIAL1	Q01085-2	0.0242	-0.457
G6PD	P11413	0.0255	-0.468
GSTP1	P09211	0.075	-0.48
DTWD2	D6RBD8	0.0432	-0.485
DDX17	A0A1X7SBZ2	0.00124	-0.495
PDE8A	O60658-6	0.0304	-0.499
DNTTIP2	Q5QJE6	0.0329	-0.499
NUMA1	Q14980	0.0313	-0.522
CTSD	A0A1B0GVD5	0.00231	-0.534
KIAA1429	Q69YN4-3	0.00436	-0.537
UTP14A	Q9BVJ6	0.0239	-0.541
RHOT1	Q8IXI2	0.0704	-0.549
ALCAM	Q13740-2	0.0441	-0.564
NR2C2	H7C3L1	0.093	-0.568
HIST1H4A	P62805	0.0304	-0.588
RBM34	A2A2V2	0.0205	-0.591
NFYC	Q5T6K7	0.0683	-0.598
P4HTM	H7C153	0.0484	-0.601
WDR46	O15213	0.0645	-0.601
HIST1H2AJ	Q99878	0.00653	-0.621
HTATSF1	O43719	0.0139	-0.628
HIBADH	P31937	0.0011	-0.65
QTRT1	Q9BXR0	0.0729	-0.65
SYNE1	A0A0C4DG40	0.0772	-0.688
HMGB3	O15347	0.00228	-0.702
MRRF	Q96E11-3	0.0621	-0.714
HIST1H2BC	P62807	0.000465	-0.743
DIS3L2	Q8IYB7	0.0255	-0.789
HIST2H3A	Q71DI3	0.0322	-0.804
GLG1	Q92896	0.0219	-0.867
P02769	P02769	0.0757	-0.917
PPT1	A0A2C9F2P4	2.03e-05	-0.925
NNMT	P40261	6.81e-05	-0.958
PDCD4	Q53EL6	5.15e-05	-0.962
CYP2S1	Q96SQ9	0.025	-1.01
SCRN2	J3QL71	0.0632	-1.03
RAB11FIP1	Q6WKZ4	0.0335	-1.04
RUNX2	I3L0L0	0.019	-1.05
IRF2BP2	Q7Z5L9	0.0909	-1.11
HIST1H1B	P16401	0.0272	-1.15
PLIN2	Q99541	0.0302	-1.26
GDPGP1	H0YN11	0.0364	-1.47
HIST1H1C	P16403	7.37e-05	-1.55
H1FX	Q92522	0.00887	-1.68
H1F0	P07305	0.00825	-1.86
EHBP1	Q8NDI1-3	0.0102	-1.94

## Sheet: part_C
name	ID	P_adj (MIX2 vs pemetrexed)	log2FC (MIX2 vs pemetrexed)
IGKV3D-20	A0A0C4DH25	6.09e-09	4.13
CYP2S1	Q96SQ9	5.58e-13	2.49
GCC1	Q96CN9	0.00312	2.38
ALDH1A3	P47895	5.58e-13	2.21
VPS13A	Q96RL7-2	0.0377	1.74
MT-ND2	P03891	0.0967	1.67
SLC4A7	Q9Y6M7-7	0.00494	1.59
PRKAG1	P54619-2	0.0159	1.47
ANXA10	Q9UJ72	0.00415	1.46
UBASH3B	Q8TF42	0.00453	1.4
PCCB	E9PEC3	0.0738	1.37
NIT1	Q86X76-2	0.0701	1.31
ASNS	P08243-2	0.0147	1.27
METAP2	P50579	0.00754	1.2
TPM4.1	P67936-2	0.0697	1.19
RABGGTA	Q92696	0.0727	1.14
CD274	Q9NZQ7	0.0805	1.02
ACTN4.1	K7EJH8	0.0453	1.01
APOOL	Q6UXV4	0.0757	0.997
CLPP	Q16740	0.0611	0.996
SAMD4A	Q9UPU9-2	0.0619	0.983
MYL6.1	P60660	0.01	0.971
AFF4	Q9UHB7	0.0752	0.957
CHD1L	Q86WJ1	0.00777	0.926
FAM105A	Q9NUU6	0.0268	0.917
MBP	P02686	0.0243	0.879
ZNF185	O15231-3	0.0122	0.876
ALDH3A1	P30838	0.0806	0.872
NMES1	Q9C002	0.081	0.865
IGF1R	C9J5X1	0.0957	0.826
DOHH	Q9BU89	0.0931	0.816
CD320	Q9NPF0-2	0.0468	0.812
NUMBL	M0QYC2	0.00251	0.808
DPP7	Q9UHL4	0.074	0.761
METTL7B	A0A087WZT2	0.0628	0.755
PTPRE	S4R2Y5	0.026	0.75
FAHD2A	Q96GK7	0.0236	0.741
ITGA2.1	E7ESP4	0.0139	0.737
TIMM10B	Q9Y5J6	0.00549	0.723
ALDH1A1	P00352	0.00728	0.723
G6PD.1	E7EUI8	0.0252	0.705
GLG1	Q92896	0.0404	0.698
FIBP	O43427-2	0.0724	0.698
G6PD	P11413	6.31e-07	0.691
RFC1	P35251-2	0.0478	0.688
DIAPH2	A6NML8	0.0605	0.684
SERPINB2	P05120	0.000196	0.64
CENPV	Q7Z7K6-3	0.0106	0.629
PM20D2	Q8IYS1	0.04	0.622
CUEDC2	Q9H467	0.0483	0.619
NT5E	P21589	0.00136	0.587
NEO1	Q59FP8	0.0204	0.586
ARPC1A	Q92747	0.0183	0.585
ANXA3	P12429	0.00138	0.576
P4HTM	H7C153	0.0184	0.576
NR2C2	H7C3L1	0.0267	0.572
C21orf33	A0A096LPI6	0.0789	0.567
GNPDA2	Q8TDQ7	0.0928	0.559
FAM195B	I3L2L5	0.0096	0.555
RILPL1	A0A1B0GVV3	0.0384	0.547
LYN	P07948	0.0666	0.545
GLTP	F5H0U5	0.0545	0.535
COPS7B	J3KQ34	0.0807	0.532
PPT1	A0A2C9F2P4	0.0223	0.53
TMEM30A	A0A669KBF5	0.0185	0.508
TLDC1	Q6P9B6	0.0093	0.498
ITGA2	P17301	0.00158	0.487
ARPC5L	Q9BPX5	0.0661	0.483
PARP1	P09874	3.65e-06	0.481
SQRDL	Q9Y6N5	0.058	0.48
TDP1	Q9NUW8	0.0177	0.47
IGF2R	P11717	0.023	0.464
ITGA3	P26006	0.00229	0.461
PYGL	P06737	0.0732	0.448
GALE	Q14376	0.0726	0.436
PAWR	Q96IZ0	0.0131	0.423
EFHD2	Q96C19	0.0438	0.42
ABHD14B	Q96IU4	0.0755	0.405
SUGP1	Q8IWZ8	0.0662	0.394
BLOC1S6	H3BNE3	0.0812	0.379
MPRIP	A0A494BZV2	0.0896	0.366
PLEC	Q15149	0.00849	0.353
ASPH	Q12797	0.0236	0.35
TXNRD1	Q16881	0.00891	0.344
SEC31A	D6REX3	0.0336	-0.301
SUPT5H	O00267	0.0043	-0.332
PCNA	P12004	0.035	-0.332
DUT	P33316-2	0.0125	-0.337
TOP2A	P11388	0.0576	-0.355
ECHS1	P30084	0.0753	-0.362
INPP5K	Q9BT40-2	0.0865	-0.367
TUBA4A	P68366	0.0511	-0.384
TMPO.1	P42166	0.0443	-0.397
FDPS	P14324-2	0.0271	-0.424
ZC3HAV1	Q7Z2W4	0.0525	-0.444
MKI67	P46013	0.0103	-0.464
KPNA2	P52292	0.00557	-0.473
TGFB2	P61812	0.0826	-0.484
DHRS3	O75911	0.052	-0.487
POR	P16435	9.13e-06	-0.5
DHFR	P00374	0.0141	-0.501
SELENBP1	Q13228-2	0.0152	-0.503
C17orf62	J3QRG5	0.0211	-0.508
GMPPA	Q96IJ6	0.0318	-0.508
DHCR24	Q15392-2	4.16e-05	-0.509
CEP76	Q8TAP6-2	0.00727	-0.543
ADI1	Q9BV57	0.0136	-0.564
IDH1	O75874	0.000797	-0.571
IDI1	Q13907	0.0177	-0.589
RRAD	P55042	0.0734	-0.6
NOL3	O60936-3	0.0359	-0.611
ACAT2	Q9BWD1	0.00582	-0.619
LRRC42	Q9Y546	0.0909	-0.62
EPHX1	P07099	0.00133	-0.717
DHCR7	Q9UBM7	0.014	-0.731
MVD	P53602	0.0489	-0.744
KPNA1	P52294	0.0581	-0.86
TCF25	Q9BQ70	0.0895	-0.905
FLYWCH2	I3L1Y9	0.0122	-0.907
GNE	Q9Y223	0.0598	-0.917
HEXIM1	O94992	0.00155	-0.955
USP22	Q9UPT9-2	0.0749	-0.984
USP11	G5E9A6	4.97e-07	-1.01
ISG15	P05161	1.06e-06	-1.04
RABAC1	M0QXH1	2.23e-06	-1.06
TTK	P33981-2	0.0729	-1.1
NDC80	O14777	9.4e-05	-1.11
APOL2	J3KQL8	0.000166	-1.12
MGME1	Q9BQP7	0.0667	-1.15
SDC1	P18827	0.0929	-1.21
MFGE8	Q08431-4	0.0257	-1.23
IFIT2	A0A087X279	0.0221	-1.3
AGR2	O95994	3.97e-05	-1.32
EPS8L2	Q9H6S3	0.003	-1.32
SLC35B2	Q8TB61-3	0.0941	-1.38
CLIC3	O95833	5.9e-07	-1.54
BRCA2	P51587	0.0771	-1.87
FADS2	O95864	4.86e-07	-2.17

## Sheet: part_D
name	ID	P_adj (MIX2 vs durvalumab)	log2FC (MIX2 vs durvalumab)
ANLN	Q9NQW6	6.48e-14	4.66
CKAP2	Q8WWK9-5	6.48e-14	4.59
TYMS	P04818	6.48e-14	4.48
KIF11	P52732	6.48e-14	4.33
AURKA	O14965	0.0218	3.85
RRM2	P31350	1.76e-11	3.78
ECT2	Q9H8V3-2	4.86e-07	3.59
DLGAP5	Q15398-3	1.19e-06	3.17
SMTN	P53814-5	0.0528	3.03
KIFC1	Q9BW19	6.48e-14	2.94
TACC3	A0A494BZT8	1.22e-09	2.91
TK1	P04183	3.47e-08	2.83
KIAA0101	Q15004	2.92e-12	2.64
SHCBP1	Q8NEM2	4.86e-08	2.64
KIF23	A0A2U3TZL8	6.48e-14	2.63
TPX2	Q9ULW0	6.48e-14	2.62
CCNB1	P14635	6.48e-14	2.59
KIF2C	Q99661	2.21e-10	2.57
AURKB	Q96GD4	1.08e-11	2.52
KIF18A	Q8NI77	1.31e-11	2.4
RACGAP1	Q9H0H5	6.48e-14	2.39
BUB1B	O60566-3	6.48e-14	2.25
ALDH1A3	P47895	6.48e-14	2.13
PRC1	O43663-4	6.48e-14	2.01
HIGD2A	Q9BW72	0.0657	1.96
CENPF	P49454	0.000288	1.93
NEIL2	Q969S2-4	0.00073	1.93
CLIC3	O95833	2.49e-09	1.92
CDCA3	J3KMY0	0.0723	1.92
FOSL1	P15407	0.0552	1.91
AXIN1	O15169-2	0.0688	1.91
TOP2A	P11388	6.48e-14	1.79
CAPN5	A0A3B3IRX8	0.0393	1.73
ZNF185	O15231-3	4.93e-09	1.71
PPP1R14A	Q96A00	0.0101	1.7
S100P	P25815	3.19e-06	1.62
UBE2S	Q16763	2.53e-06	1.6
NFKB2	Q00653	0.0761	1.59
MGLL	A0A0C4DFN3	0.000649	1.55
FAM64A	I3L419	0.0172	1.52
PRKAG1	P54619-2	0.0235	1.52
CDC45	A0A5K1VW85	0.00412	1.5
PLAUR	Q03405	0.015	1.5
ASNS	P08243-2	0.00671	1.47
TFIP11	Q9UBB9	0.0336	1.47
KNSTRN	V9GY01	0.00258	1.45
PGM2L1	Q6PCE3	0.0172	1.42
ASPM	Q8IZT6	1.14e-05	1.36
HIP1	O00291-3	0.0803	1.36
DIAPH3	Q9NSV4-4	0.017	1.34
KPNA2	P52292	6.48e-14	1.32
DHFR	P00374	6.48e-14	1.31
MAP1LC3B	H3BTL1	1.79e-06	1.31
DCK	P27707	0.0037	1.3
ICAM1	P05362	0.0215	1.26
STXBP1	A0A1B0GWF2	0.0185	1.23
FOSL2	P15408	0.0389	1.23
UAP1	Q16222	2.29e-07	1.21
GYS1	P13807	0.002	1.21
EPHA2	P29317	3.46e-11	1.2
CKS1B	P61024	7.65e-06	1.19
MKI67	P46013	6.48e-14	1.18
FHL2	Q14192	1.17e-05	1.17
RB1	P06400	0.0231	1.15
TMEM214	Q6NUQ4	4.66e-10	1.13
CDA	P32320	0.0216	1.12
LIMA1	Q9UHB6	1.84e-13	1.11
CDK2	G3V5T9	0.0573	1.1
NDC80	O14777	0.000588	1.09
KRT81	A0A087X106	4.64e-13	1.03
CUEDC2	Q9H467	0.000114	1.02
COL6A1	A0A087X0S5	0.00382	0.998
NCK1	P16333	0.0144	0.992
KIAA1524	A0A087X211	0.000831	0.963
CMAS	Q8NFW8	0.001	0.948
TDP2	O95551	0.00153	0.933
PDLIM4	P50479	0.00646	0.921
NMES1	Q9C002	0.0899	0.921
LSM14B	Q9BX40	0.0236	0.915
DOHH	Q9BU89	0.0752	0.909
IGKC	A0A5H1ZRQ3	0.0155	0.902
DUT	P33316-2	6.48e-14	0.895
MAP1B	P46821	1.51e-09	0.862
SERPINB2	P05120	4.36e-07	0.862
TAX1BP3	O14907	0.0119	0.859
MAD2L1	Q13257	0.000291	0.851
TACC1	O75410-2	0.00451	0.847
HMGCS1	Q01581	0.0129	0.847
ANXA3	P12429	7.65e-07	0.838
UBE2C	O00762	0.0632	0.828
NUF2	Q9BZD4	0.0763	0.821
PLAU	E7ET40	0.0204	0.81
S100A16	Q96FQ6	0.00112	0.796
JUNB	P17275	0.0625	0.795
LYN	P07948	0.00279	0.793
DLG3	Q5JUW8	0.00687	0.785
SPATS2	Q86XZ4	0.0205	0.754
TUBB3	Q13509	0.0597	0.744
PTER	Q96BW5	0.00236	0.708
GINS3	Q9BRX5	0.0713	0.703
HLA-Cw	Q5RIP0	0.0266	0.693
SQRDL	Q9Y6N5	0.00237	0.691
BICD2	Q8TD16	0.0586	0.686
ENO2	P09104	0.0108	0.685
CDK1	P06493	0.0012	0.671
TLDC1	Q6P9B6	0.000241	0.67
ANXA8L2	Q5VT79	0.092	0.667
PREPL	Q4J6C6-4	0.00249	0.656
SFN	P31947	0.073	0.655
SQSTM1	Q13501	5.18e-07	0.653
RAI14	Q9P0K7-4	0.0241	0.653
MFI2	P08582	0.0189	0.648
TUBB2A	Q13885	0.0123	0.638
GLIPR1	P48060	0.0311	0.618
NEO1	Q59FP8	0.0265	0.613
PAPSS2	O95340	0.0361	0.607
ACAA1	P09110	0.0484	0.599
NUP188	Q5SRE5	0.0209	0.59
CKAP5	Q14008-2	0.000708	0.586
TRIP13	Q15645	0.0467	0.586
MYCBP2	A0A499FJI4	0.0056	0.585
SAMD9	Q5K651	0.0961	0.574
LIG1	F5GZ28	0.0711	0.572
WDHD1	O75717	0.02	0.568
CISD1	Q9NZ45	0.0164	0.558
GSTM3	P21266	7.17e-05	0.55
SUPT4H1	P63272	0.0547	0.549
NCEH1	Q6PIU2	0.0514	0.548
RBKS	Q9H477-2	0.0402	0.547
NT5E	P21589	0.0191	0.513
RAP2B	P61225	0.0305	0.496
OAT	P04181	0.0173	0.474
CD44	P16070	0.0382	0.457
AMZ2	Q86W34	0.0443	0.455
TGM2	P21980	0.0325	0.447
SUPT5H	O00267	6.87e-05	0.443
CBX5	P45973	0.018	0.44
ITGA2	P17301	0.0161	0.437
HINT3	Q9NQE9	0.0181	0.437
TOMM34	Q15785	0.0858	0.426
REEP4	E5RGS2	0.0624	0.402
PAWR	Q96IZ0	0.0663	0.379
NUDC	Q9Y266	0.0318	0.378
KRT19	P08727	0.0754	0.376
CPNE3	O75131	0.0972	0.375
NAMPT	P43490	0.0188	0.37
FLNB	O75369-8	0.0802	0.322
DPYSL2	A0A1C7CYX9	0.083	-0.277
SRSF1	J3KTL2	0.0678	-0.321
DDX17	A0A1X7SBZ2	0.0487	-0.339
DHCR24	Q15392-2	0.0475	-0.343
PLOD2	O00469-2	0.0411	-0.359
RALY	Q9UKM9	0.0578	-0.393
POR	P16435	0.003	-0.411
SMARCD1	Q96GM5	0.0485	-0.431
TFRC	P02786	0.00621	-0.439
CTSD	A0A1B0GVD5	0.0112	-0.444
PSAP	P07602	0.00601	-0.47
GNS	H7C3P4	0.0372	-0.477
ZC3HAV1	Q7Z2W4	0.0459	-0.484
DBI	P07108	0.0509	-0.495
ITGAV	P06756-3	0.00783	-0.498
SUMO1	B8ZZN6	0.0315	-0.499
HIST1H2BC	P62807	0.0322	-0.506
NUMA1	Q14980	0.019	-0.51
HIST1H4A	P62805	0.0503	-0.514
PACSIN2	Q9UNF0-2	0.0184	-0.515
PDCD4	Q53EL6	0.0845	-0.524
DPF2	J3KMZ8	0.0118	-0.557
C20orf24	Q9BUV8-4	0.0762	-0.56
GCLC	P48506	0.00425	-0.576
HMGB3	O15347	0.0126	-0.577
HIST1H2AJ	Q99878	0.00582	-0.582
QTRT1	Q9BXR0	0.0907	-0.584
RTFDC1	A0A0A0MQR2	0.0113	-0.587
CTNNA1	P35221-2	0.000154	-0.598
NR2C2	H7C3L1	0.0293	-0.61
EPHX1	P07099	0.0226	-0.613
USP32	Q8NFA0	0.0175	-0.642
RFTN1	Q14699	0.00815	-0.65
MPHOSPH8	Q99549	0.0141	-0.654
CAV1	Q03135	0.016	-0.655
TBL1XR1	Q9BZK7	0.00012	-0.666
ALCAM	Q13740-2	0.00296	-0.668
C14orf159	Q7Z3D6-3	0.0926	-0.701
DTWD2	D6RBD8	4.65e-05	-0.711
IDH1	O75874	2.5e-05	-0.716
LEPREL1	Q8IVL5	0.0315	-0.761
LIPA	A0A0A0MT32	0.0372	-0.783
ABCC1	I3L4X2	0.0886	-0.787
IFIT1	P09914-2	0.00443	-0.838
EPB41L1.1	Q9H4G0-2	0.0394	-0.871
DIS3L2	Q8IYB7	0.00226	-0.893
RAB11FIP1	Q6WKZ4	0.0614	-0.893
TTC21B	A0A494C0N4	0.0595	-0.918
HIST1H1B	P16401	0.0867	-0.921
MCCC1	Q96RQ3	0.000125	-0.947
MRRF	Q96E11-3	0.000947	-0.947
SET.1	Q01105-2	0.0645	-1.01
AGR2	O95994	0.00879	-1.06
ELMSAN1	A0A1C7CYX1	0.0994	-1.06
DNAJC1	Q96KC8	0.00183	-1.07
SCRN2	J3QL71	0.0223	-1.08
NNMT	P40261	2.41e-07	-1.09
PTPRJ	Q12913	0.000316	-1.13
GJA1	P17302	0.0297	-1.16
HIST1H1C	P16403	0.000881	-1.29
H1F0	P07305	0.06	-1.4
GRIPAP1	A0A087WT45	0.0333	-1.71
ZFHX3	Q15911	0.0625	-1.94
ATG16L1	E7EVC7	0.0686	-2.09
BRCA2	P51587	0.0256	-2.3
FADS2	O95864	6.33e-10	-2.76
