# Supplementary material for: Exploring the Molecular Players behind the Potentiation of Chemotherapy Effects by Durvalumab in Lung Adenocarcinoma Cell Lines
Source: Pharmaceutics. 2023 May 12;15(5):1485. doi: 10.3390/pharmaceutics15051485 (PMC10221650; doi:10.3390/pharmaceutics15051485)
Supplement: Supplementary file 1 [file pharmaceutics-15-01485-s001.zip › pharmaceutics-2306971_Supplementary Table S3.xlsx]

## Sheet: part-I
A549 (MIX1 vs durvalumab)	HCC44 (MIX1 vs durvalumab)		A549 (MIX2 vs durvalumab)	HCC44 (MIX2 vs durvalumab)		A549 (MIX1 vs durvalumab)	A549 (MIX2 vs durvalumab)		HCC44 (MIX1 vs durvalumab)	HCC44 (MIX2 vs durvalumab)
FDXR	CKAP2		TYMS	ANLN		FDXR	TYMS		CKAP2	ANLN
RETSAT	KIF11		CISD3	CKAP2		RETSAT	CISD3		KIF11	CKAP2
KRT19	ANLN		ANLN	TYMS		KRT19	ANLN		ANLN	TYMS
MCM2	AURKA		CKAP2	KIF11		MCM2	CKAP2		AURKA	KIF11
HIST2H3A	RRM2		NUPR1	AURKA		HIST2H3A	NUPR1		RRM2	AURKA
HIST1H1C	DLGAP5		TPX2	RRM2		HIST1H1C	TPX2		DLGAP5	RRM2
TFB2M	SHCBP1		KIF11	ECT2		TFB2M	KIF11		SHCBP1	ECT2
KIF4A	CCNB1		RRM2	DLGAP5		KIF4A	RRM2		CCNB1	DLGAP5
HIST1H1B	KIF23		PPAT	SMTN		HIST1H1B	PPAT		KIF23	SMTN
UBL7	KIAA0101		TK1	KIFC1		UBL7	TK1		KIAA0101	KIFC1
SMCHD1	KIFC1		FAM83D	TACC3		SMCHD1	FAM83D		KIFC1	TACC3
	AXIN1		CENPF	TK1			CENPF		AXIN1	TK1
	TACC3		CCNB1	KIAA0101			CCNB1		TACC3	KIAA0101
	TK1		FANCI	SHCBP1			FANCI		TK1	SHCBP1
	RACGAP1		KIF2C	KIF23			KIF2C		RACGAP1	KIF23
	TPX2		TOP2A	TPX2			TOP2A		TPX2	TPX2
	AURKB		NMES1	CCNB1			NMES1		AURKB	CCNB1
	KIF2C		PRC1	KIF2C			PRC1		KIF2C	KIF2C
	CLIC3		SHCBP1	AURKB			SHCBP1		CLIC3	AURKB
	DDX58		FDXR	KIF18A			FDXR		DDX58	KIF18A
	KIF18A		NFKB2	RACGAP1			NFKB2		KIF18A	RACGAP1
	CENPF		CISD1	BUB1B			CISD1		CENPF	BUB1B
	HIGD2A		SNAP25	ALDH1A3			SNAP25		HIGD2A	ALDH1A3
	PLK1		DRAP1	PRC1			DRAP1		PLK1	PRC1
	PRC1		ASMTL	HIGD2A			ASMTL		PRC1	HIGD2A
	UBE2S		MKI67	CENPF			MKI67		UBE2S	CENPF
	COL6A1		GSTM3	NEIL2			GSTM3		COL6A1	NEIL2
	FAM83D		GMNN	CLIC3			GMNN		FAM83D	CLIC3
	KPNA2		PBK	CDCA3			PBK		KPNA2	CDCA3
	ICAM1		FBXO22	FOSL1			FBXO22		ICAM1	FOSL1
	BUB1B		TPM1	AXIN1			TPM1		BUB1B	AXIN1
	MYO6		HSPA4L	TOP2A			HSPA4L		MYO6	TOP2A
	TOP2A		CMAS	CAPN5			CMAS		TOP2A	CAPN5
	TFIP11		COX7A2	ZNF185			COX7A2		TFIP11	ZNF185
	SERPINB8		DHFR	PPP1R14A			DHFR		SERPINB8	PPP1R14A
	TYMS		EPHA2	S100P			EPHA2		TYMS	S100P
	IFIT2		PDXDC1	UBE2S			PDXDC1		IFIT2	UBE2S
	DIAPH3		KIF23	NFKB2			KIF23		DIAPH3	NFKB2
	NEIL2		CTPS1	MGLL			CTPS1		NEIL2	MGLL
	CRABP2		LSM14A	FAM64A			LSM14A		CRABP2	FAM64A
	PGM2L1		KPNA2	PRKAG1			KPNA2		PGM2L1	PRKAG1
	MAP1LC3B		CKS1B	CDC45			CKS1B		MAP1LC3B	CDC45
	NMES1		PDE6D	PLAUR			PDE6D		NMES1	PLAUR
	HMGCS1		SDHB	ASNS			SDHB		HMGCS1	ASNS
	NDC80		DBN1	TFIP11			DBN1		NDC80	TFIP11
	TTK		POLR3A	KNSTRN			POLR3A		TTK	KNSTRN
	UPP1		SDHA	PGM2L1			SDHA		UPP1	PGM2L1
	PTGS2		SUPT5H	ASPM			SUPT5H		PTGS2	ASPM
	MGLL		SHMT2	HIP1			SHMT2		MGLL	HIP1
	SLC12A4		HIST1H4A	DIAPH3			HIST1H4A		SLC12A4	DIAPH3
	PPP1R18		PGK1	KPNA2			PGK1		PPP1R18	KPNA2
	MFGE8		ATP2B1	DHFR			ATP2B1		MFGE8	DHFR
	CKS2		NAMPT	MAP1LC3B			NAMPT		CKS2	MAP1LC3B
	KNSTRN		HIST2H3A	DCK			HIST2H3A		KNSTRN	DCK
	GBP1		GCLC	ICAM1			GCLC		GBP1	ICAM1
	FHL2		STC2	STXBP1			STC2		FHL2	STXBP1
	UBE2C		TFB2M	FOSL2			TFB2M		UBE2C	FOSL2
	SLC30A7		LAMTOR2	UAP1			LAMTOR2		SLC30A7	UAP1
	SQLE		TBC1D9B	GYS1			TBC1D9B		SQLE	GYS1
	SQSTM1		NRP1	EPHA2			NRP1		SQSTM1	EPHA2
	MKI67		FTL	CKS1B			FTL		MKI67	CKS1B
	NUF2		PLSCR1	MKI67			PLSCR1		NUF2	MKI67
	EPS8L2		TAX1BP1	FHL2			TAX1BP1		EPS8L2	FHL2
	LIMA1		UBL7	RB1			UBL7		LIMA1	RB1
	KIAA1524		S100P	TMEM214			S100P		KIAA1524	TMEM214
	KIF20B		HIST1H1C	CDA			HIST1H1C		KIF20B	CDA
	UBAP2		H1FX	LIMA1			H1FX		UBAP2	LIMA1
	RB1		AKAP13	CDK2			AKAP13		RB1	CDK2
	CDA		TMEM30A	NDC80			TMEM30A		CDA	NDC80
	EPHA2		SLC7A11	KRT81			SLC7A11		EPHA2	KRT81
	GNE		H1F0	CUEDC2			H1F0		GNE	CUEDC2
	PDLIM4		HIST1H1B	COL6A1			HIST1H1B		PDLIM4	COL6A1
	CDK1		ALG13	NCK1			ALG13		CDK1	NCK1
	MAD2L1		PTPN12	KIAA1524			PTPN12		MAD2L1	KIAA1524
	CKS1B		PBXIP1	CMAS			PBXIP1		CKS1B	CMAS
	TUBB3		CES1	TDP2			CES1		TUBB3	TDP2
	DUSP3		CEACAM6	PDLIM4			CEACAM6		DUSP3	PDLIM4
	SERPINB2		SCD	NMES1			SCD		SERPINB2	NMES1
	PLAU		TGFBR2	LSM14B			TGFBR2		PLAU	LSM14B
	GLIPR1		HPGD	DOHH			HPGD		GLIPR1	DOHH
	TUBB2A		IREB2	IGKC			IREB2		TUBB2A	IGKC
	ISG15		SLC12A2	DUT			SLC12A2		ISG15	DUT
	SPTAN1.1			MAP1B					SPTAN1.1	MAP1B
	ZNF185			SERPINB2					ZNF185	SERPINB2
	KRT81			TAX1BP3					KRT81	TAX1BP3
	NEDD4L			MAD2L1					NEDD4L	MAD2L1
	APOL2			TACC1					APOL2	TACC1
	SQRDL			HMGCS1					SQRDL	HMGCS1
	MAP1B			ANXA3					MAP1B	ANXA3
	UAP1			UBE2C					UAP1	UBE2C
	TAX1BP3			NUF2					TAX1BP3	NUF2
	MGST2			PLAU					MGST2	PLAU
	NCEH1			S100A16					NCEH1	S100A16
	TMEM214			JUNB					TMEM214	JUNB
	WASF2			LYN					WASF2	LYN
	KIAA0100			DLG3					KIAA0100	DLG3
	SUPT4H1			SPATS2					SUPT4H1	SPATS2
	ACAA1			TUBB3					ACAA1	TUBB3
	SDCBP			PTER					SDCBP	PTER
	TJP2			GINS3					TJP2	GINS3
	FKBP9			HLA-Cw					FKBP9	HLA-Cw
	TLDC1			SQRDL					TLDC1	SQRDL
	ANXA3			BICD2					ANXA3	BICD2
	NCAPH			ENO2					NCAPH	ENO2
	MAP2K3			CDK1					MAP2K3	CDK1
	NAMPT			TLDC1					NAMPT	TLDC1
	C17orf62			ANXA8L2					C17orf62	ANXA8L2
	CKAP5			PREPL					CKAP5	PREPL
	SYNGR2			SFN					SYNGR2	SFN
	TXNDC9			SQSTM1					TXNDC9	SQSTM1
	MAP4K4			RAI14					MAP4K4	RAI14
	REEP4			MFI2					REEP4	MFI2
	SLK			TUBB2A					SLK	TUBB2A
	TUBA4A			GLIPR1					TUBA4A	GLIPR1
	SUPT5H			NEO1					SUPT5H	NEO1
	NCAPG			PAPSS2					NCAPG	PAPSS2
	HSPH1			ACAA1					HSPH1	ACAA1
	GSTM3			NUP188					GSTM3	NUP188
	TUBB6			CKAP5					TUBB6	CKAP5
	OAT			TRIP13					OAT	TRIP13
	KRT19			MYCBP2					KRT19	MYCBP2
	SLC2A1			SAMD9					SLC2A1	SAMD9
	RAB18			LIG1					RAB18	LIG1
	FLNB			WDHD1					FLNB	WDHD1
	CKB			CISD1					CKB	CISD1
	EHD1			GSTM3					EHD1	GSTM3
	AKR1B1			SUPT4H1					AKR1B1	SUPT4H1
	HSPA1B			NCEH1					HSPA1B	NCEH1
	SRSF1			RBKS					SRSF1	RBKS
	UBTF			NT5E					UBTF	NT5E
	MCM6			RAP2B					MCM6	RAP2B
	SDF4			OAT					SDF4	OAT
	TRIM28			CD44					TRIM28	CD44
	LMNB1			AMZ2					LMNB1	AMZ2
	GTF2I			TGM2					GTF2I	TGM2
	TIAL1			SUPT5H					TIAL1	SUPT5H
	G6PD			CBX5					G6PD	CBX5
	GSTP1			ITGA2					GSTP1	ITGA2
	DTWD2			HINT3					DTWD2	HINT3
	DDX17			TOMM34					DDX17	TOMM34
	PDE8A			REEP4					PDE8A	REEP4
	DNTTIP2			PAWR					DNTTIP2	PAWR
	NUMA1			NUDC					NUMA1	NUDC
	CTSD			KRT19					CTSD	KRT19
	KIAA1429			CPNE3					KIAA1429	CPNE3
	UTP14A			NAMPT					UTP14A	NAMPT
	RHOT1			FLNB					RHOT1	FLNB
	ALCAM			DPYSL2					ALCAM	DPYSL2
	NR2C2			SRSF1					NR2C2	SRSF1
	HIST1H4A			DDX17					HIST1H4A	DDX17
	RBM34			DHCR24					RBM34	DHCR24
	NFYC			PLOD2					NFYC	PLOD2
	P4HTM			RALY					P4HTM	RALY
	WDR46			POR					WDR46	POR
	HIST1H2AJ			SMARCD1					HIST1H2AJ	SMARCD1
	HTATSF1			TFRC					HTATSF1	TFRC
	HIBADH			CTSD					HIBADH	CTSD
	QTRT1			PSAP					QTRT1	PSAP
	SYNE1			GNS					SYNE1	GNS
	HMGB3			ZC3HAV1					HMGB3	ZC3HAV1
	MRRF			DBI					MRRF	DBI
	HIST1H2BC			ITGAV					HIST1H2BC	ITGAV
	DIS3L2			SUMO1					DIS3L2	SUMO1
	HIST2H3A			HIST1H2BC					HIST2H3A	HIST1H2BC
	GLG1			NUMA1					GLG1	NUMA1
	P02769			HIST1H4A					P02769	HIST1H4A
	PPT1			PACSIN2					PPT1	PACSIN2
	NNMT			PDCD4					NNMT	PDCD4
	PDCD4			DPF2					PDCD4	DPF2
	CYP2S1			C20orf24					CYP2S1	C20orf24
	SCRN2			GCLC					SCRN2	GCLC
	RAB11FIP1			HMGB3					RAB11FIP1	HMGB3
	RUNX2			HIST1H2AJ					RUNX2	HIST1H2AJ
	IRF2BP2			QTRT1					IRF2BP2	QTRT1
	HIST1H1B			RTFDC1					HIST1H1B	RTFDC1
	PLIN2			CTNNA1					PLIN2	CTNNA1
	GDPGP1			NR2C2					GDPGP1	NR2C2
	HIST1H1C			EPHX1					HIST1H1C	EPHX1
	H1FX			USP32					H1FX	USP32
	H1F0			RFTN1					H1F0	RFTN1
	EHBP1			MPHOSPH8					EHBP1	MPHOSPH8
				CAV1						CAV1
				TBL1XR1						TBL1XR1
				ALCAM						ALCAM
				C14orf159						C14orf159
				DTWD2						DTWD2
				IDH1						IDH1
				LEPREL1						LEPREL1
				LIPA						LIPA
				ABCC1						ABCC1
				IFIT1						IFIT1
				EPB41L1.1						EPB41L1.1
				DIS3L2						DIS3L2
				RAB11FIP1						RAB11FIP1
				TTC21B						TTC21B
				HIST1H1B						HIST1H1B
				MCCC1						MCCC1
				MRRF						MRRF
				SET.1						SET.1
				AGR2						AGR2
				ELMSAN1						ELMSAN1
				DNAJC1						DNAJC1
				SCRN2						SCRN2
				NNMT						NNMT
				PTPRJ						PTPRJ
				GJA1						GJA1
				HIST1H1C						HIST1H1C
				H1F0						H1F0
				GRIPAP1						GRIPAP1
				ZFHX3						ZFHX3
				ATG16L1						ATG16L1
				BRCA2						BRCA2
				FADS2						FADS2

## Sheet: part-II
A549 (MIX1 vs cisplatin)	HCC44 (MIX1 vs cisplatin)		A549 (MIX2 vs pemetrexed)	HCC44 (MIX2 vs pemetrexed)		A549 (MIX1 vs cisplatin)	A549 (MIX2 vs pemetrexed)		HCC44 (MIX1 vs cisplatin)	HCC44 (MIX2 vs pemetrexed)
IGKV3D-20	IGKV3D-20		SRP19	IGKV3D-20		IGKV3D-20	SRP19		IGKV3D-20	IGKV3D-20
ACTN4.1	PTGS2		NSMCE1	CYP2S1		ACTN4.1	NSMCE1		PTGS2	CYP2S1
SYNJ2BP-COX16	DDX58		Q3ZBD7	GCC1		SYNJ2BP-COX16	Q3ZBD7		DDX58	GCC1
GSPT2	EEF1A2		IFI30	ALDH1A3		GSPT2	IFI30		EEF1A2	ALDH1A3
RB1	MAP1LC3B		ABCB7	VPS13A		RB1	ABCB7		MAP1LC3B	VPS13A
UVRAG	GLIPR1		MAP1LC3B	MT-ND2		UVRAG	MAP1LC3B		GLIPR1	MT-ND2
NO66	FHL2		MED23	SLC4A7		NO66	MED23		FHL2	SLC4A7
CCDC134	SQRDL		MZT2B	PRKAG1		CCDC134	MZT2B		SQRDL	PRKAG1
CREM	MVP		ARMC1	ANXA10		CREM	ARMC1		MVP	ANXA10
WDR92	MAP2K3		EEFSEC	UBASH3B		WDR92	EEFSEC		MAP2K3	UBASH3B
CTR9	KYNU		TWISTNB	PCCB		CTR9	TWISTNB		KYNU	PCCB
44260	SDCBP		NENF	NIT1		44260	NENF		SDCBP	NIT1
GLE1	SERPINB2		LDAH	ASNS		GLE1	LDAH		SERPINB2	ASNS
IGHG1	BLVRB		EXOSC8	METAP2		IGHG1	EXOSC8		BLVRB	METAP2
FAM96B	SQSTM1		UBAP2	TPM4.1		FAM96B	UBAP2		SQSTM1	TPM4.1
EPS15L1	PLEC		ANO6	RABGGTA		EPS15L1	ANO6		PLEC	RABGGTA
ATP5J2-PTCD1	SET		ATXN2	CD274		ATP5J2-PTCD1	ATXN2		SET	CD274
RAB5A	DUT		TMEM109	ACTN4.1		RAB5A	TMEM109		DUT	ACTN4.1
RMND1	TOP2A		PPP1R10	APOOL		RMND1	PPP1R10		TOP2A	APOOL
CHCHD1	PDCD4		WDR55	CLPP		CHCHD1	WDR55		PDCD4	CLPP
DCTN5	CUEDC2		CCDC97	SAMD4A		DCTN5	CCDC97		CUEDC2	SAMD4A
FUT8	TRIOBP		P15497	MYL6.1		FUT8	P15497		TRIOBP	MYL6.1
DCXR			AKAP8	AFF4		DCXR	AKAP8			AFF4
AKAP1			IGF2BP2	CHD1L		AKAP1	IGF2BP2			CHD1L
INTS6			STAT5B	FAM105A		INTS6	STAT5B			FAM105A
RBM26			PTMS	MBP		RBM26	PTMS			MBP
HOOK3			RBBP6	ZNF185		HOOK3	RBBP6			ZNF185
DAGLB			HIP1R	ALDH3A1		DAGLB	HIP1R			ALDH3A1
ANXA8L2				NMES1		ANXA8L2				NMES1
ZCCHC6				IGF1R		ZCCHC6				IGF1R
XPA				DOHH		XPA				DOHH
KIF3A				CD320		KIF3A				CD320
MED1				NUMBL		MED1				NUMBL
GTPBP1				DPP7		GTPBP1				DPP7
MLF2				METTL7B		MLF2				METTL7B
SMCHD1				PTPRE		SMCHD1				PTPRE
CBX4				FAHD2A		CBX4				FAHD2A
ANKRD17				ITGA2.1		ANKRD17				ITGA2.1
LGALS8				TIMM10B		LGALS8				TIMM10B
DNASE2				ALDH1A1		DNASE2				ALDH1A1
DPY30				G6PD.1		DPY30				G6PD.1
RIN1				GLG1		RIN1				GLG1
CFDP1				FIBP		CFDP1				FIBP
MED11				G6PD		MED11				G6PD
IGF2BP2				RFC1		IGF2BP2				RFC1
GATAD2A				DIAPH2		GATAD2A				DIAPH2
MALL				SERPINB2		MALL				SERPINB2
LAMC1				CENPV		LAMC1				CENPV
PANK4				PM20D2		PANK4				PM20D2
PRDX2				CUEDC2		PRDX2				CUEDC2
ZNF609				NT5E		ZNF609				NT5E
				NEO1						NEO1
				ARPC1A						ARPC1A
				ANXA3						ANXA3
				P4HTM						P4HTM
				NR2C2						NR2C2
				C21orf33						C21orf33
				GNPDA2						GNPDA2
				FAM195B						FAM195B
				RILPL1						RILPL1
				LYN						LYN
				GLTP						GLTP
				COPS7B						COPS7B
				PPT1						PPT1
				TMEM30A						TMEM30A
				TLDC1						TLDC1
				ITGA2						ITGA2
				ARPC5L						ARPC5L
				PARP1						PARP1
				SQRDL						SQRDL
				TDP1						TDP1
				IGF2R						IGF2R
				ITGA3						ITGA3
				PYGL						PYGL
				GALE						GALE
				PAWR						PAWR
				EFHD2						EFHD2
				ABHD14B						ABHD14B
				SUGP1						SUGP1
				BLOC1S6						BLOC1S6
				MPRIP						MPRIP
				PLEC						PLEC
				ASPH						ASPH
				TXNRD1						TXNRD1
				SEC31A						SEC31A
				SUPT5H						SUPT5H
				PCNA						PCNA
				DUT						DUT
				TOP2A						TOP2A
				ECHS1						ECHS1
				INPP5K						INPP5K
				TUBA4A						TUBA4A
				TMPO.1						TMPO.1
				FDPS						FDPS
				ZC3HAV1						ZC3HAV1
				MKI67						MKI67
				KPNA2						KPNA2
				TGFB2						TGFB2
				DHRS3						DHRS3
				POR						POR
				DHFR						DHFR
				SELENBP1						SELENBP1
				C17orf62						C17orf62
				GMPPA						GMPPA
				DHCR24						DHCR24
				CEP76						CEP76
				ADI1						ADI1
				IDH1						IDH1
				IDI1						IDI1
				RRAD						RRAD
				NOL3						NOL3
				ACAT2						ACAT2
				LRRC42						LRRC42
				EPHX1						EPHX1
				DHCR7						DHCR7
				MVD						MVD
				KPNA1						KPNA1
				TCF25						TCF25
				FLYWCH2						FLYWCH2
				GNE						GNE
				HEXIM1						HEXIM1
				USP22						USP22
				USP11						USP11
				ISG15						ISG15
				RABAC1						RABAC1
				TTK						TTK
				NDC80						NDC80
				APOL2						APOL2
				MGME1						MGME1
				SDC1						SDC1
				MFGE8						MFGE8
				IFIT2						IFIT2
				AGR2						AGR2
				EPS8L2						EPS8L2
				SLC35B2						SLC35B2
				CLIC3						CLIC3
				BRCA2						BRCA2
				FADS2						FADS2
